# Supplementary material
Source: PubMed Central journal article supplement (PMC3490590)
Supplement: supp_pp.112.204578_204578Supplemental_Figs.pdf [file supp_pp.112.204578_204578Supplemental_Figs.pdf]

**A**

```

HvLsi6 1 MSVTNTPTRANSRVNYSNEIHDLSTVQDGAPSLAPSMYYQ-EKSFADFFPPHLLKKVISELVATFLLVVFVTCGAASIYG
OsLsi6 1 MASTT-APSRNTRNYSNEIHDLSTVQS--VSAVPSVYYP-EKSFADIFPPNLLKKVISEVVATFLLVVFVTCGAASIYG
ZmLsi6 1 MAAAS-TTSRTNSRVNYSNEIHDLSTVQS--GSVPTLFYP-DKSIADIFPPHLGKKVISEVVATFLLVVFVTCGAASIYG
HvLsi1 1 MASN----SRNSRATFSSEIHDIGTVQN---STTPSMVYYTERSIADYFPPHLLKKVSEVSTFLLVVFVTCGAAISA
OsLsi1 1 MASNN---SRTNSRANYSNEIHDLSTVQN---GMTPTMYYG-EKAIADFFPPHLLKKVSEVVATFLLVFMTCGAAGISG
ZmLsi1 1 MSTN----SRNSRANFNNEIHDIGTAQN---SSMPPTY--DRSLADIFPPHLLKKVSEVSTFLLVVFVTCGAAGIYG

HvLsi6 80 ADVTRVSQLGQSVVGGGLIVTVMIYATGHISGAHMNPAVTLSFACFRHFPWIQVPFYWAAQFTGAMCAAFVLRVLAHPITV
OsLsi6 77 EDMKRISQLGQSVVGGGLIVTVMIYATGHISGAHMNPAVTLSFACFRHFPWIQVPFYWAAQFTGAMCAAFVLRVLYPIEV
ZmLsi6 77 EDNRRISQLGQSVAGGLIVTVMIYATGHISGAHMNPAVTLSFACFRHFPWIQVPFYWAAQFTGAMCAAFVLKAVLHPIAV
HvLsi1 74 HDVTRISQLGQSVAGGLIVVMIYAVGHISGAHMNPAVTLAFAIFRHFPWIQVPFYWAAQFTGAICASFVLKAVLHPITV
OsLsi1 74 SDLRISQLGQSIAGGLIVTVMIYAVGHISGAHMNPAVTLAFAVFRHFPWIQVPFYWAAQFTGAICASFVLKAVIHPVDV
ZmLsi1 72 SDKDRISQLGQSVAGGLIVTVMIYAVGHISGAHMNPAVTLAFAVFRHFPWIQVPFYWAAQFTGSICASFVLKAVLHPIAV

HvLsi6 160 LGTTTPTGPHWHALVIEIIVTFNMMFITCAVATDSRAVGELAGLAVGSAVCITSIIFAGPVSGGSMNPARTLAPAVASGVY
OsLsi6 157 LGTTTPTGPHWHALVIEIVVTFNMMFVTCVATDSRAVGELAGLAVGSAVCITSIIFAGPVSGGSMNPARTLAPAVASNVY
ZmLsi6 157 IGTTPSGPHWHALLIEIVVTFNMMFVTCVATDSRAVGELAGLAVGSAVCITSIIFAGPVSGGSMNPARTLAPAVASNVF
HvLsi1 154 IGTTEPVGPHWHALVIEVVVTFNMMFVTLAVATDTRAVGELAGLAVGSSVCITSIIFAGAVSGGSMNPARTLGPALASNRY
OsLsi1 154 IGTTPVGPWHSLVVEVIVTFNMMFVTLAVATDTRAVGELAGLAVGSVAVCITSIIFAGAVSGGSMNPARTLGPALASNKF
ZmLsi1 152 LGTTTPTGPHWHSLVIEIIVTFNMMFVTLAVATDTRAVGELAGLAVGSVAVCITSIIFAGAVSGGSMNPARTLGPALASNLY

HvLsi6 240 TGLWIYFLGPVIGTLSGAWVYTYIRFEEEPSVKDG--PQKLSSFKLRRQLSQRSMAVDEFDHFV-----
OsLsi6 237 TGLWIYFLGPVVGTLGAWVYTYIRFEEAPAAAGGAAPQKLSSFKLRRQLSQS-MAADEFDNV-----
ZmLsi6 237 TGLWIYFLGPVIGTLSGAWVYTYIRFEEAPAAKD---TQRLSSFKLRRMQSQ--LAADEFDTV-----
HvLsi1 234 PGLWLYFLGPVLTGTLGAWTYTYIRFEDPP--KDA--PQKLSSFKLRRQLSQS-SVAADD-DELDHIPV
OsLsi1 234 DGLWIYFLGPVMTGTLGAWTYTFIRFEDTP-KEGS--SQKLSSFKLRRLSQSQSIAADDVDEMENIQV
ZmLsi1 232 TGLWIYFLGPVLTGTLGAWTYTYIRFEEAPSHKDM--SQKLSSFKLRRQLSQS-SVAVDD-DELDHIQV

```

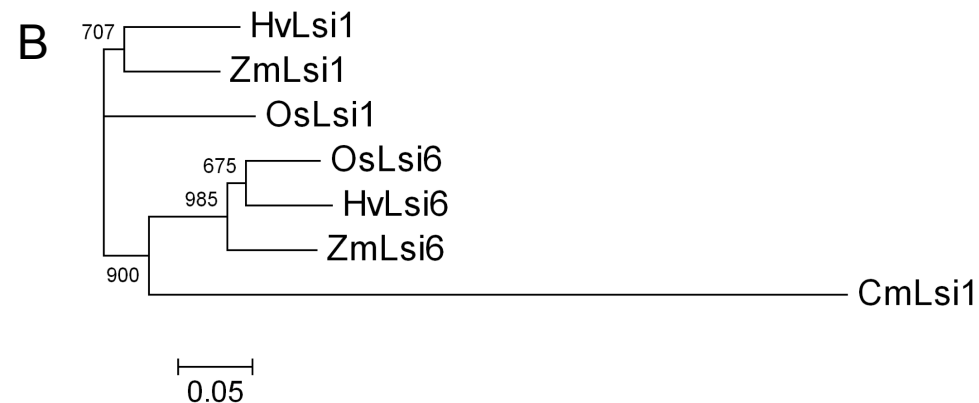

**Supplemental Figure S1. Alignment and phylogenetic tree of HvLsi6.**

(A) Alignment of HvLsi6 with other Si influx transporter. Two NPA motifs and four amino acid residues of ar/R selectivity filter are indicated by blue and green dotted boxes, respectively. (B) Phylogenetic tree of HvLsi6.

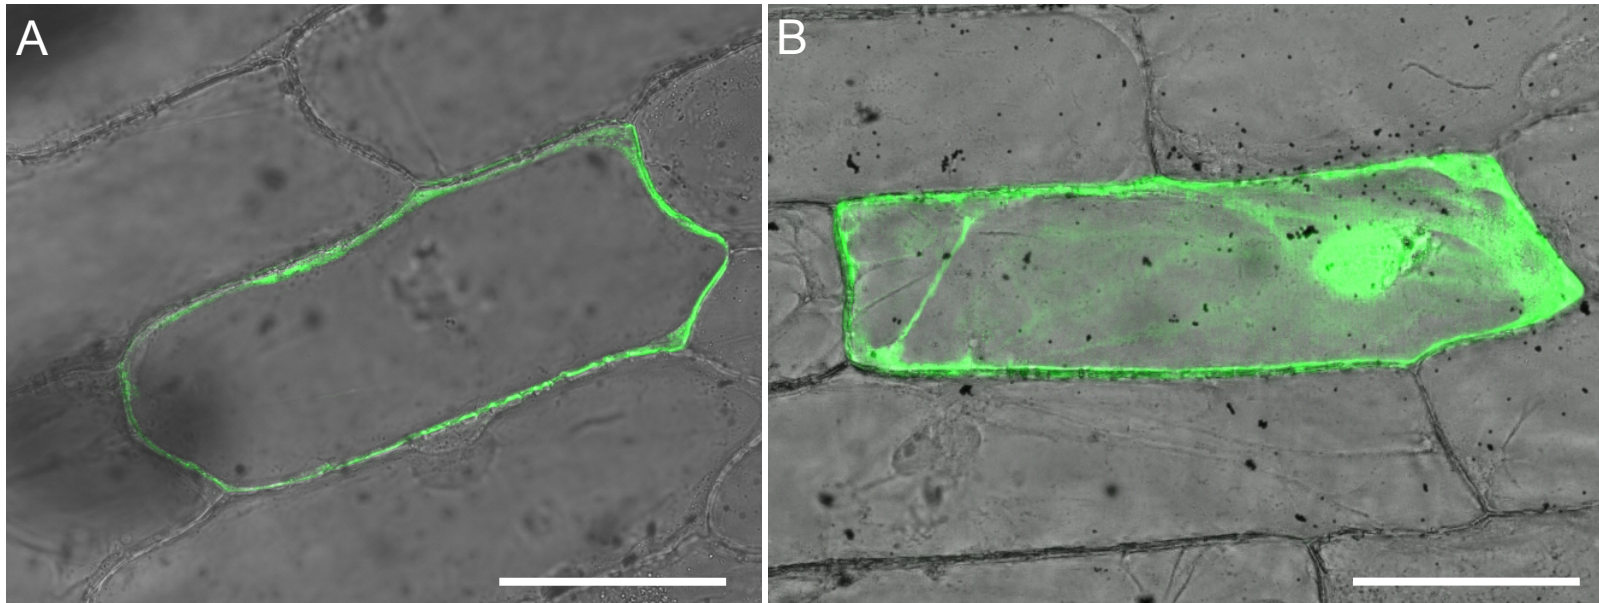

**Supplemental Figure S2. Subcellular localization of HvLsi6.**

(A) GFP-HvLsi6 fusion or (B) GFP alone was transiently expressed in onion epidermal cells. Scale bar = 100  $\mu$ m.
